# Supplementary material for: microRNA arm-imbalance in part from complementary targets mediated decay promotes gastric cancer progression
Source: PubMed Central journal article supplement (PMC6764945; doi:10.1038/s41467-019-12292-5), 2019-09-27
Supplement: 41467_2019_12292_MOESM1_ESM.pdf [file 41467_2019_12292_MOESM1_ESM.pdf]

**Supplementary Information**

**microRNA arm-imbalance partially from targets-mediated decay  
promotes gastric cancer progression**

**Zhang *et al.* 2019**

## Supplementary figures

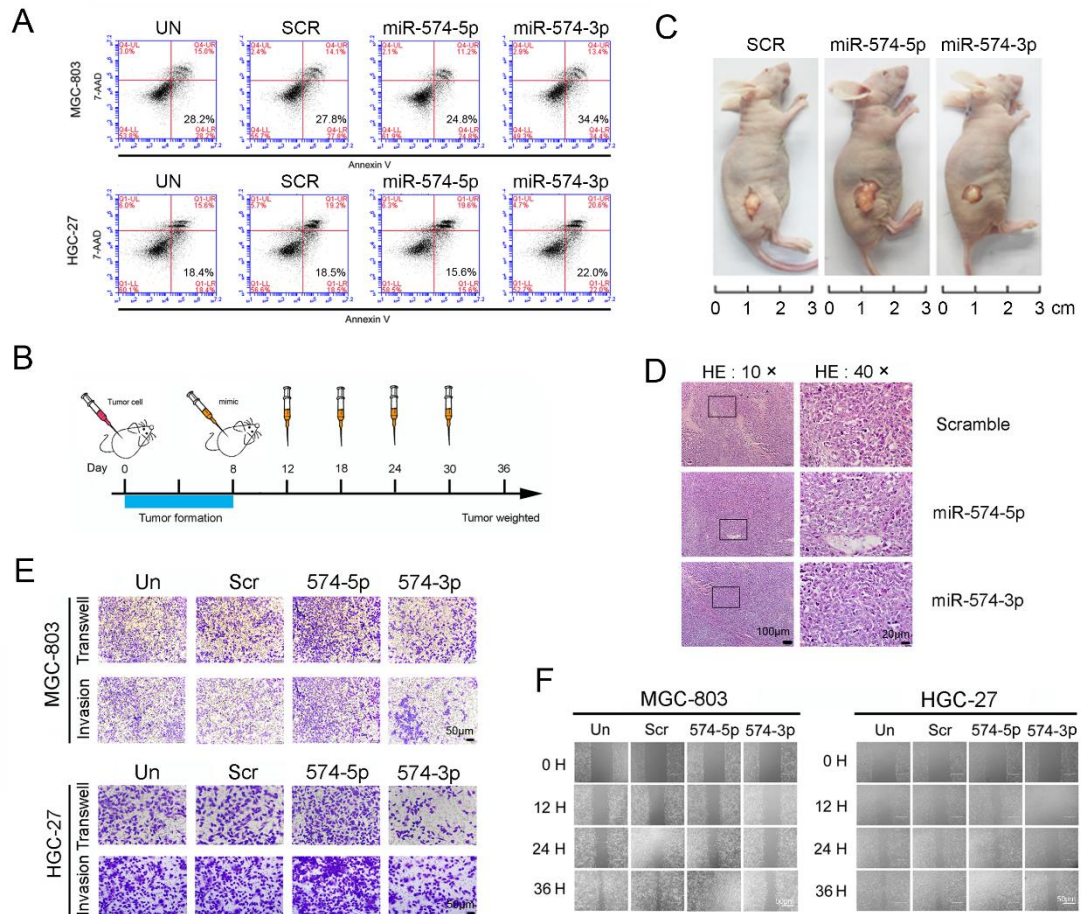

**Supplementary figure 1 miR-574-5p and -3p divergently control GC cell growth and metastasis.** (A) The effects of miR-574-5p/-3p overexpression on GC cell apoptosis. (B) Diagram illustrating the experimental design of the nude mice xenograft experiment. (C) Photographs of mice with engrafted tumors. (D) H&E staining of tumors from xenograft mice. (E) Representative images of transwell and invasion assay of GC cells treated with scramble or miR-574-5p/-3p mimics. (F) Representative images of wound-healing assay of GC cells treated with scramble or miR-574-5p/-3p mimics.

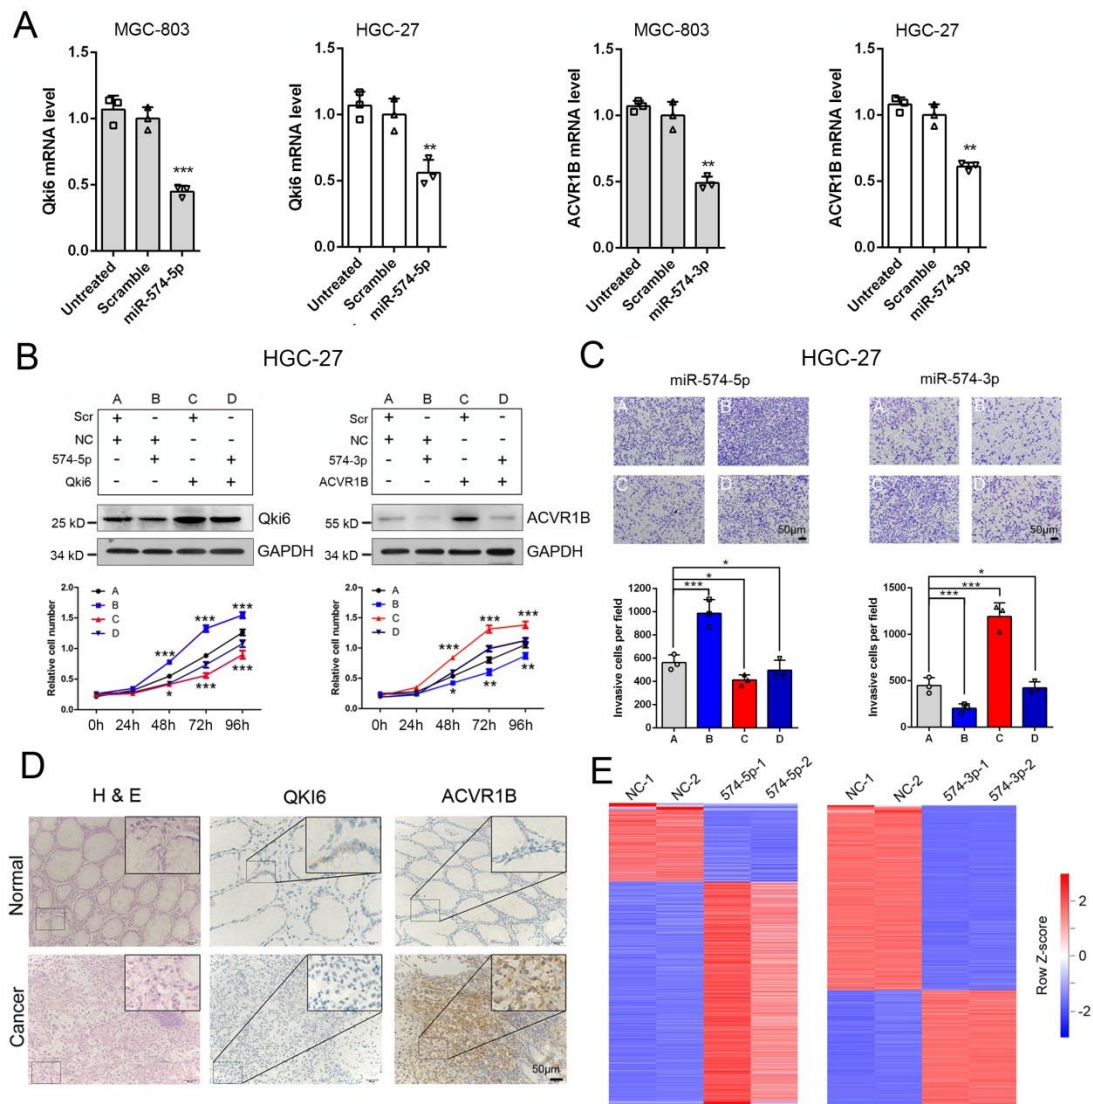

**Supplementary figure 2 miR-574-5p/3p targeted endogenous Qki6 and ACVR1B respectively.** (A) The relative RNA level of Qki-6 and ACVR1B in GC cells treated with scramble or miR-574-5p/-3p mimics. (B) The protein level of Qki-6 and ACVR1B and cell proliferation rate in HGC-27 cells co-transfected with microRNA mimics and Qki-6 or ACVR1B overexpression. (C) The relative invasive cells of HGC-27 cells in different groups as shown in panel B. (D) Immunohistochemistry analysis of QKI6 and ACVR1B expression in GC patients. (E) Heatmap showing the changes of global gene expression upon miR-574-5p/-3p mimics transfection in MGC-803 cells. Data are shown as means  $\pm$  s.d.. \* $P$ <0.05, \*\* $P$ <0.01, \*\*\* $P$ <0.001, Student's  $t$ -test.

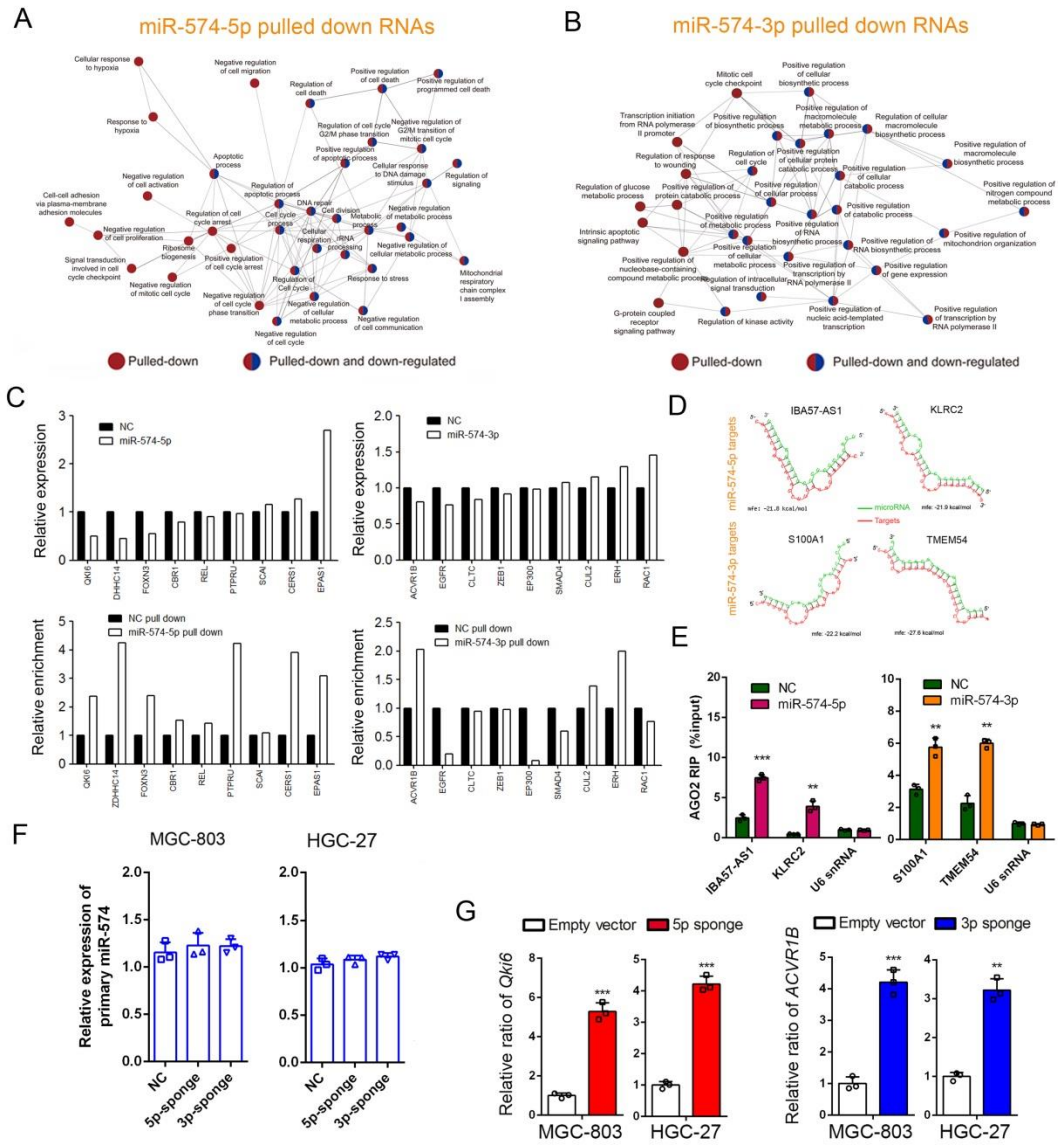

**Supplementary figure 3 Identification of the highly complementary targets of miR-574-5p/3p.** (A, B) GO and KEGG pathway analysis of miR-574-5p/-3p pulled down targets. (C) The expression change of the reported miR-574 targets in MGC-803 cells with miR-574 overexpression; The relative enrichment of the reported miR-574 targets by biotinylated miR-574 mimics in GC cells. (D) RNAhybrid predicted miR-574-5p or miR-574-3p binding sites in RNA sequence of IBA57-AS1, KLRC2 or S100A1, TMEM54. (E) Ago2 RIP validation of the binding of miRNA and the potential targets. (F) Relative expression of primary-miR-574 in GC cells with artificial miR-574-5p/-3p sponge transfection. (G) RNA level of Qki-6 or ACVR1B in GC cells with overexpression of artificial miR-574-5p/-3p sponges. Data are shown as means  $\pm$  s.d.. \* $P < 0.05$ , \*\* $P < 0.01$ , \*\*\* $P < 0.001$ , Student's  $t$ -test.

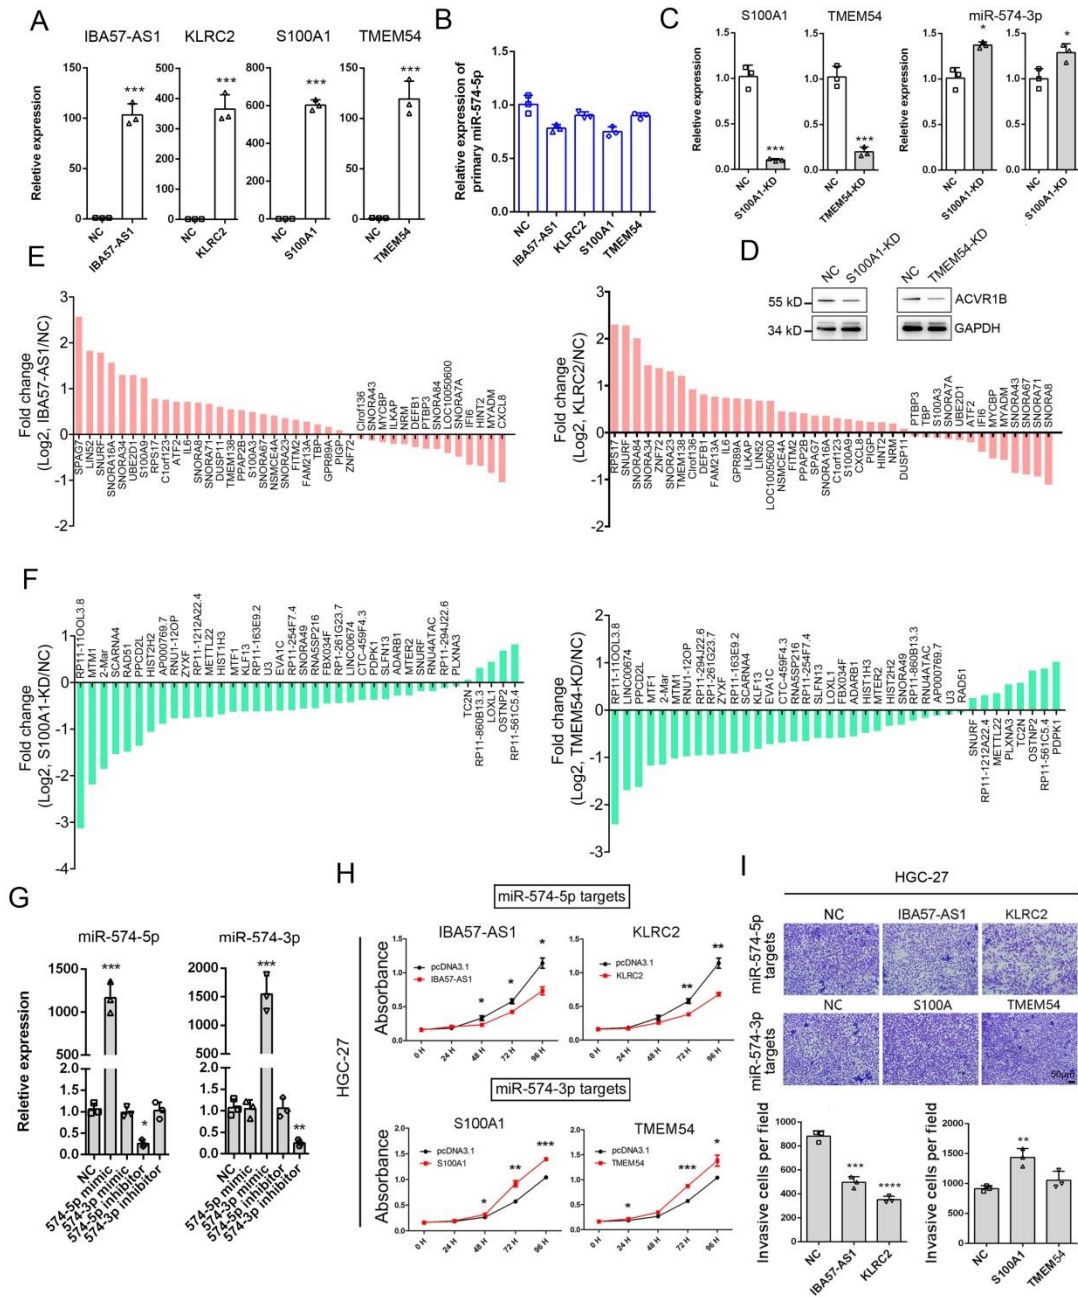

**Supplementary figure 4 Potential role of miR-574-5p/3p targets in GC carcinogenesis.** (A) IBA57-AS1, KLRC2, S100A1 and TMEM54 were overexpressed in MGC-803 cells. (B) Relative expression of primary-miR-574 in GC cells with overexpression of IBA57-AS1, KLRC2, S100A1 and TMEM54. (C) Examination of miR-574-3p expression in MGC-803 cells when S100A1 and TMEM54 were suppressed. (D) Protein level of ACVR1B in MGC-803 cells with S100A1 and TMEM54 knock down. (E) The expression change of the potential miR-574-5p targets when IBA57-AS1, KLRC2 was

overexpressed. (F) The expression change of the potential miR-574-3p targets when S100A1, TMEM54 was suppressed. (G) Examination of miR-574-5p and miR-574-3p expression in MGC-803 cells when miR-574-5p/3p was overexpressed or suppressed. (H) The proliferation rate of HGC-27 cells with overexpression of IBA57-AS1, KLRC2, S100A1 and TMEM54. (I) The invasion ability of HGC-27 cells with overexpression of IBA57-AS1, KLRC2, S100A1 and TMEM54. Data are shown as means  $\pm$  s.d.. \* $P$ <0.05, \*\* $P$ <0.01, \*\*\* $P$ <0.001, Student's  $t$ -test.

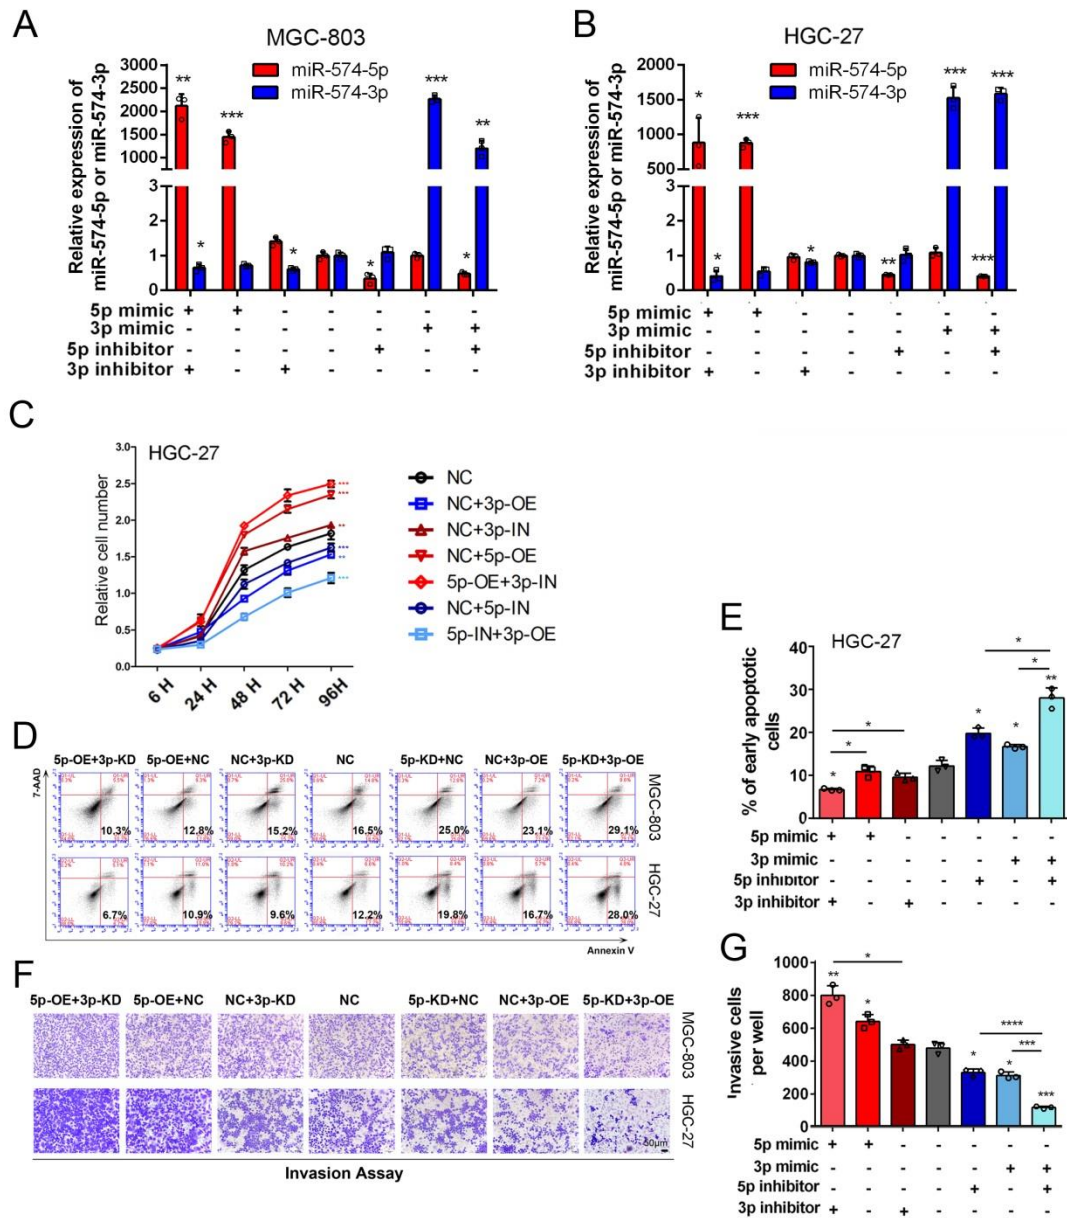

**Supplementary figure 5 Arm-imbalance of miR-574 promoted GC progression.** MGC-803 and HGC-27 cells were treated with miR-574-5p/3p mimics (5p-OE/3p-OE) and miR-574-5p/3p inhibitors (5p-KD/3p-KD) at multiple combinations to mimic the arm-imbalance. (A, B) The relative expression of miR-574-5p/-3p in MGC-803 (A) and HGC-27 (B) cells. (C) The proliferation rate of HGC-27 cells of the above seven groups. (D, E) Cell apoptosis was analyzed in MGC-803 and HGC-27 cells and the representative result was shown. (F) Representative images of *in vitro* migration assay of MGC-803 and HGC-27 cells. (G) Invasive cell number of HGC-27 cells of the above seven groups. Data are shown as means  $\pm$  s.d.. \* $P$ <0.05, \*\* $P$ <0.01, \*\*\* $P$ <0.001, Student's *t*-test.

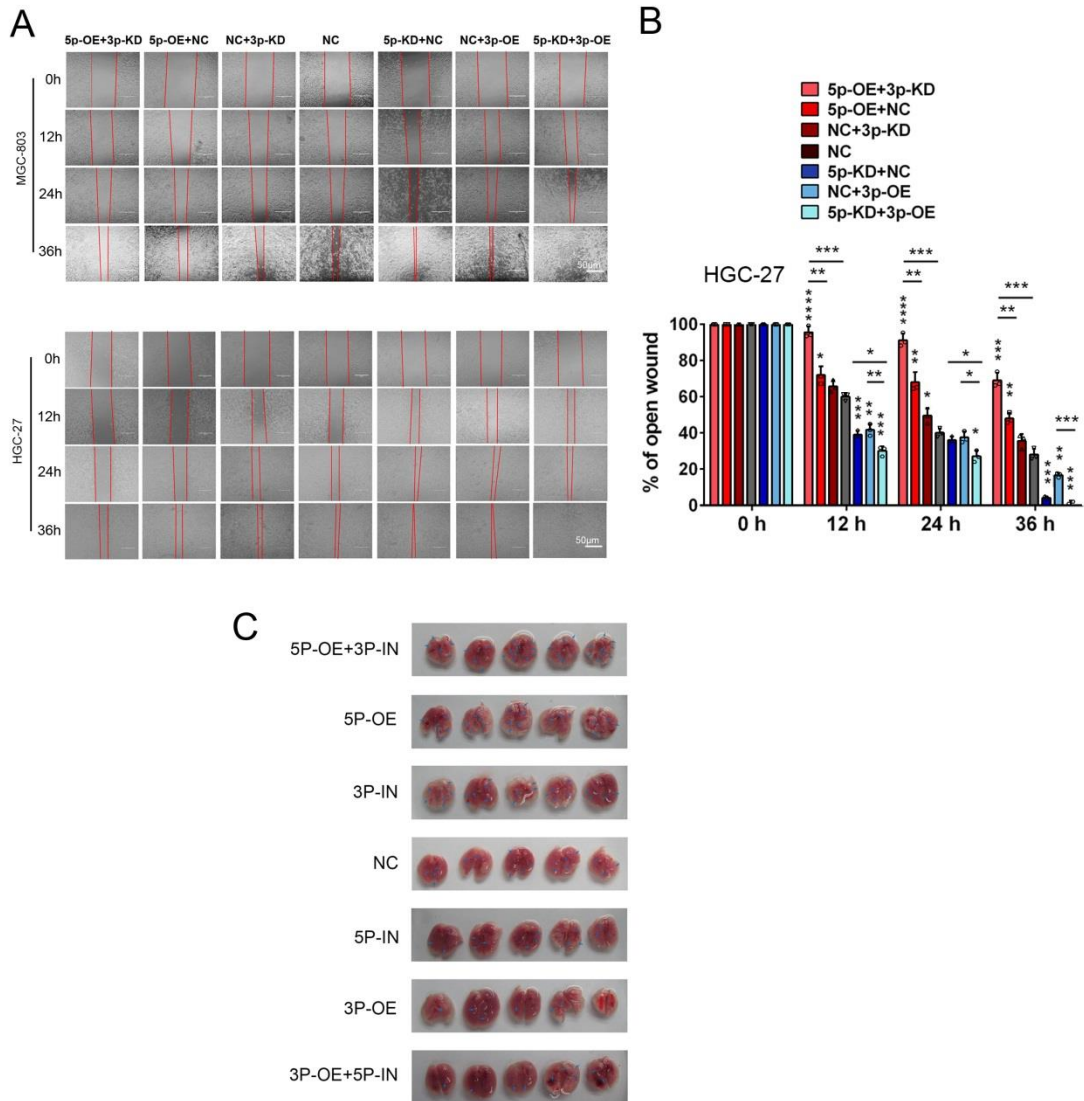

**Supplementary figure 6 Arm-imbalance of miR-574 promoted GC progression.**

(A) Representative images of wound-healing assay of MGC-803 and HGC-27 cells. (B) Percentage of wound closure of HGC-27 cells of the above seven groups. (C) Images of metastatic nodules formation in lung tissues. Data are shown as means  $\pm$  s.d.. \* $P$ <0.05, \*\* $P$ <0.01, \*\*\* $P$ <0.001, Student's  $t$ -test.



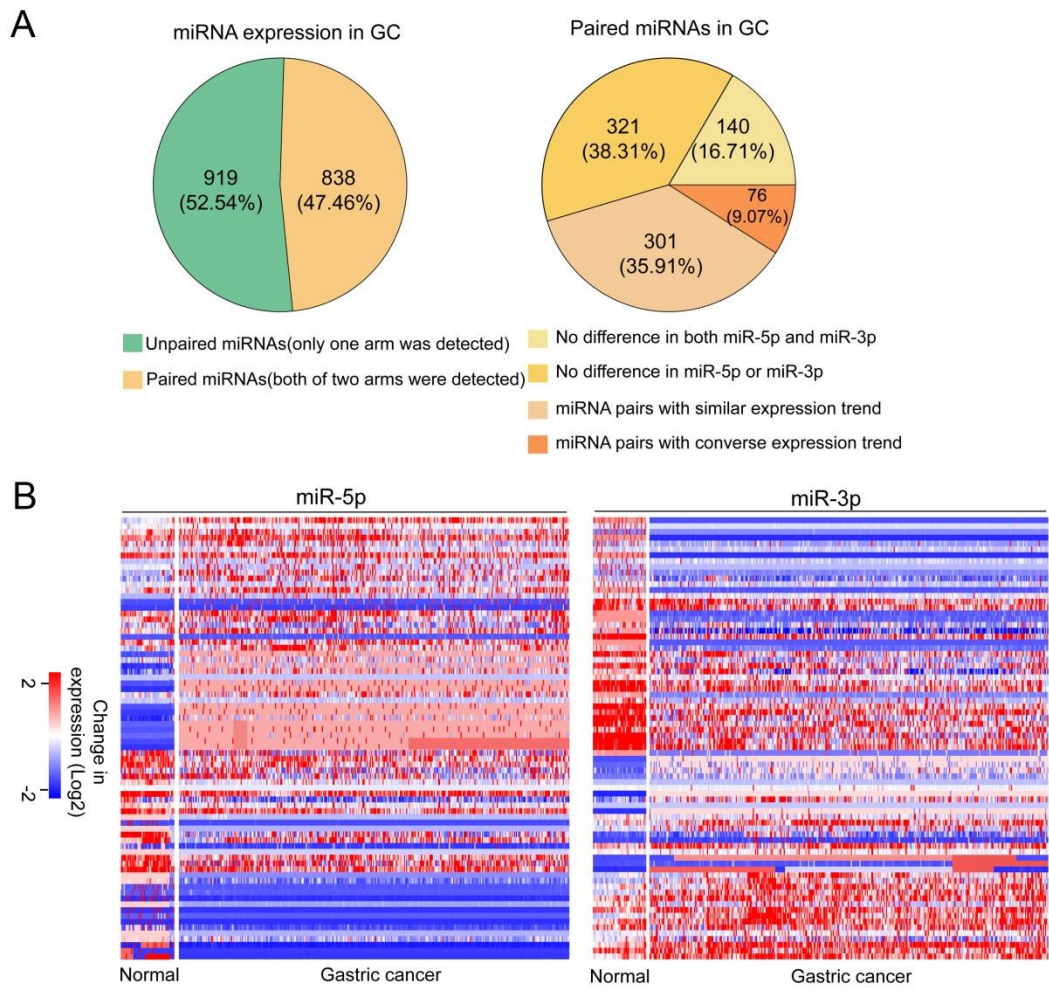

**Supplementary figure 7 Global analysis of two arms of a miRNA (miR-5p and miR-3p) in gastric cancer tissues.** (A) The expression and variation of miR-5p and miR-3p in gastric cancer tissues. (B) The expression change of miR-5p and miR-3p from the same miRNA precursor in gastric cancer tissues compared with the normal controls.

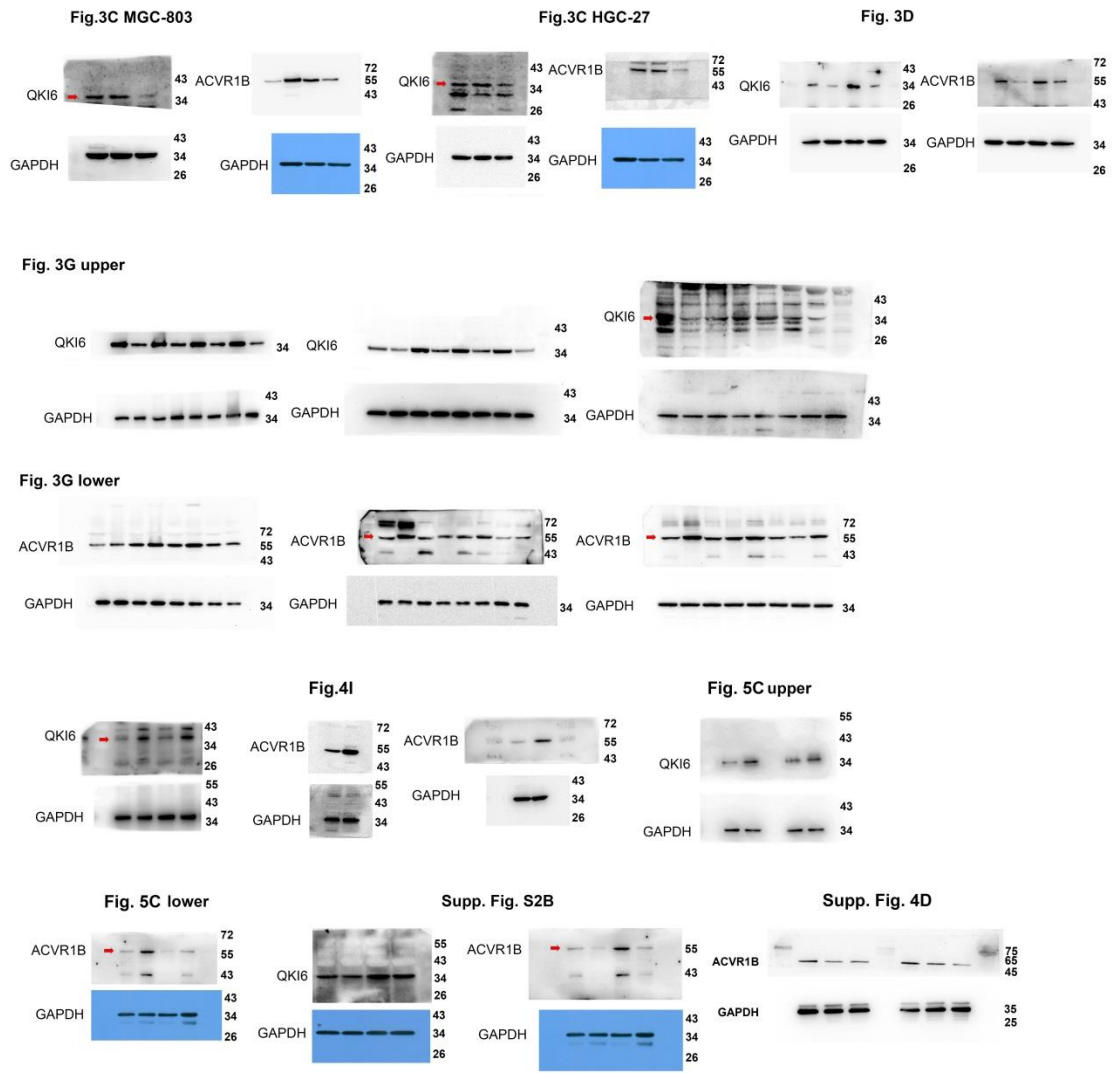

**Supplementary figure 8 Uncropped and unprocessed scans of the immunoblots.**

## Supplementary Tables

Supplementary Table 1. Association Between miR-574-5p Levels in gastric cancer and Clinical Findings

| Variables           | 574-5p<br>C/N<1 (N) | log2 | 574-5p<br>C/N>1 (N) | log2 |        | $\chi^2$ | <i>P</i> |
|---------------------|---------------------|------|---------------------|------|--------|----------|----------|
| Gender              |                     |      |                     |      |        |          |          |
| Male                | 43                  |      | 81                  |      |        | 1.207    | 0.272    |
| Female              | 11                  |      | 32                  |      |        |          |          |
| Age (years)         |                     |      |                     |      |        |          |          |
| < 60                | 24                  |      | 51                  |      | 0.042  | 0.593    | 0.001    |
| ≥60                 | 30                  |      | 63                  |      |        |          |          |
| Location            |                     |      |                     |      |        |          |          |
| Upper               | 22                  |      | 35                  |      |        | 4.496    | 0.106    |
| Middle              | 19                  |      | 22                  |      |        |          |          |
| Down                | 9                   |      | 29                  |      |        |          |          |
| TNM stage           |                     |      |                     |      |        |          |          |
| I                   | 5                   |      | 2                   |      | 0.137  | 0.092    | 7.965    |
| II                  | 17                  |      | 24                  |      |        |          |          |
| III                 | 22                  |      | 62                  |      |        |          |          |
| IV                  | 8                   |      | 12                  |      |        |          |          |
| Perineural invasion |                     |      |                     |      |        |          |          |
| Negative            | 34                  |      | 69                  |      | 0.097  | 0.213    | 0.146    |
| Positive            | 19                  |      | 44                  |      |        |          |          |
| Tumor thrombus      |                     |      |                     |      |        |          |          |
| Negative            | 28                  |      | 66                  |      | -0.094 | 0.231    | 0.644    |
| Positive            | 25                  |      | 45                  |      |        |          |          |

Supplementary Table 2. Association Between miR-574-3p Levels in gastric cancer and Clinical Findings

| Variables           | 574-5p<br>C/N<1 (N) | log2 | 574-5p<br>C/N>1 (N) | log2 | Spearman<br>R | P     | X <sup>2</sup> | P     |
|---------------------|---------------------|------|---------------------|------|---------------|-------|----------------|-------|
| Gender              |                     |      |                     |      |               |       |                |       |
| Male                | 81                  |      | 43                  |      |               |       | 0.001          | 0.980 |
| Female              | 28                  |      | 15                  |      |               |       |                |       |
| Age (years)         |                     |      |                     |      |               |       |                |       |
| < 60                | 51                  |      | 23                  |      | -0.019        | 0.806 | 0.550          | 0.458 |
| ≥60                 | 59                  |      | 34                  |      |               |       |                |       |
| Location            |                     |      |                     |      |               |       |                |       |
| Upper               | 36                  |      | 21                  |      | -0.059        | 0.492 | 5.343          | 0.069 |
| Middle              | 21                  |      | 20                  |      |               |       |                |       |
| Down                | 29                  |      | 9                   |      |               |       |                |       |
| TNM stage           |                     |      |                     |      |               |       |                |       |
| I                   | 1                   |      | 6                   |      | -0.311        | 0.000 | 27.256         | 0.000 |
| II                  | 18                  |      | 23                  |      |               |       |                |       |
| III                 | 69                  |      | 15                  |      |               |       |                |       |
| IV                  | 12                  |      | 8                   |      |               |       |                |       |
| Perineural invasion |                     |      |                     |      |               |       |                |       |
| Negative            | 68                  |      | 35                  |      | -0.113        | 0.147 | 0.015          | 0.901 |
| Positive            | 41                  |      | 22                  |      |               |       |                |       |
| Tumor thrombus      |                     |      |                     |      |               |       |                |       |
| Negative            | 68                  |      | 26                  |      | 0.126         | 0.109 | 39.320         | 0.000 |
| Positive            | 16                  |      | 54                  |      |               |       |                |       |

Supplementary Table 3. Survival analysis.

| Variables              | Patients<br>(N = 124) | Deaths<br>(%)<br>(n = 73) | MST <sup>a</sup><br>(months) | Log-Rank<br>P | Adjusted<br>HR | 95% CI       | P     |
|------------------------|-----------------------|---------------------------|------------------------------|---------------|----------------|--------------|-------|
| miR-574-5p (log2 C/N)  |                       |                           |                              |               |                |              |       |
| <1                     | 47                    | 19<br>(40.4)              | Not<br>reached               | 0.009         | 1.825          | 1.089-3.058  | 0.022 |
| >1                     | 77                    | 54<br>(70.1)              | 34.467                       |               |                |              |       |
| miR-574-3p (log2 C/N)  |                       |                           |                              |               |                |              |       |
| >1                     | 46                    | 20<br>(43.5)              | Not<br>reached               | 0.020         | 1.989          | 1.177-3.363  | 0.010 |
| <1                     | 78                    | 53<br>(67.9)              | 34.467                       |               |                |              |       |
| No. of high-risk miRNA |                       |                           |                              |               |                |              |       |
| 0                      | 29                    | 10<br>(34.5)              | Not<br>reached               | 0.010         | 1              |              | 0.013 |
| 1                      | 35                    | 19<br>(54.3)              | 54                           |               | 1.577          | 1.299-5.164  | 0.244 |
| 2                      | 60                    | 44<br>(73.3)              | 32                           |               | 2.590          | 0.733-3.393  | 0.007 |
| Age (years)            |                       |                           |                              |               |                |              |       |
| <60                    | 50                    | 25<br>(50.0)              | 57.93                        | 0.055         | 1.598          | 0.985-2.592  | 0.058 |
| ≥60                    | 74                    | 48<br>(35.1)              | 33.63                        |               |                |              |       |
| TNM stages             |                       |                           |                              |               |                |              |       |
| I+II                   | 38                    | 6 (20.2)                  | Not<br>reached               | 0.000         | 9.174          | 3.959-21.258 | 0.000 |

|                  |    |              |       |       |       |             |       |
|------------------|----|--------------|-------|-------|-------|-------------|-------|
| III+IV           | 84 | 67<br>(84.2) | 25.80 |       |       |             |       |
| Nervous invasion |    |              |       |       |       |             |       |
| Absent           | 72 | 45<br>(37.5) | 40.80 | 0.518 | 0.855 | 0.530-1.378 | 0.520 |
| Present          | 50 | 27<br>(46.5) | 44.03 |       |       |             |       |
| Tumor thrombus   |    |              |       |       |       |             |       |
| Absent           | 73 | 46<br>(37.0) | 41.46 | 0.499 | 1.178 | 0.732-1.895 | 0.500 |
| Present          | 50 | 27<br>(46.0) | 44.03 |       |       |             |       |

NOTE. <sup>a</sup>MST: Median survival time.

Supplementary Table 4. Primers used in this study.

|                                                                                                          |                         |
|----------------------------------------------------------------------------------------------------------|-------------------------|
| Primers for real-time RCR of miRNAs (one common reverse primer MiR-anti was used for all miRNAs) (5'-3') |                         |
| miR-574-5p forward                                                                                       | GCGTGAGTGTGTGTGTGTGA    |
| miR-574-3p forward                                                                                       | GCACGCTCATGCACACA       |
| miR-anti                                                                                                 | GTGCAGGGTCCGAGGT        |
| U6 forward                                                                                               | CTCGCTTCGGCAGCACATATACT |
| U6 reverse                                                                                               | ACGCTTCACGAATTTGCGTGTC  |
| Primers for real-time RCR of genes (5'-3')                                                               |                         |
| Qki6 forward                                                                                             | GCCCGAAGCTGGTTTAATCTATA |
| Qki6 reverse                                                                                             | TCGTTGGGAAAGCCATACCTAAT |
| KLRC2 forward                                                                                            | TAAATGGTTTGGCTTTCAAACA  |
| KLRC2 reverse                                                                                            | TGAAGATCCACACTGGGCTGAT  |
| RUN12 forward                                                                                            | CACGCCTAAAAAGTAGACTGAC  |
| RUN12 reverse                                                                                            | TAACGGAGAAAAGAACGAAAAA  |
| IBAS57-AS1 forward                                                                                       | CAGAGGACAATTTAGGCAGGAA  |
| IBAS57-AS1 reverse                                                                                       | CTCAGCAGGGGGTATGGGACA   |
| RPS17 forward                                                                                            | GCCCAGTAAGAGGTATCTCCAT  |
| RPS17 reverse                                                                                            | TCAATAATCTCCTGATCCAAGG  |
| EAF2 forward                                                                                             | TTGGTGAAGGTGAACAGGTGAC  |
| EAF2 reverse                                                                                             | AAATGCATTCTTTAAGTAAGG   |
| SOX18 forward                                                                                            | GCCAGGCGGCAGACGAGT      |
| SOX18 reverse                                                                                            | CGTTGTGCAGGTCCGGGTT     |
| S100A1 forward                                                                                           | ACTTCCAGGAGTATGTGGTGCT  |
| S100A1 reverse                                                                                           | TGTGGCTGTCTGCTCAACTGT   |
| NTN4 forward                                                                                             | AGGGAATCGTAGTGGTGGTGT   |
| NTN4 reverse                                                                                             | CATCTGGAGCTGAGAAGGGTCT  |

|                                                                        |                                   |
|------------------------------------------------------------------------|-----------------------------------|
| TMEM forward                                                           | CGGAGAACGTGTTTGCTGTA              |
| TMEM reverse                                                           | ATCATGTGGTGGCTGCTTT               |
| IQCH-AS1 forward                                                       | CGTGGGTTCTCACTATGTTGC             |
| IQCH-AS1 reverse                                                       | CAGTTGGACATGGTGGCTTCT             |
| ACVR1B forward                                                         | ATGTGGCTGTGAAAATATTCTTCT          |
| ACVR1B reverse                                                         | AGTGTTCATATTAATGGTTTCATCAAG       |
| $\beta$ -actin forward                                                 | CTGGCACCACACCTTCTACA              |
| $\beta$ -actin reverse                                                 | AGCACAGCCTGGATAGCAAC              |
| GAPDH forward                                                          | TCAACGACCACTTTGTCAAGCTCAGCT       |
| GAPDH reverse                                                          | GGTGGTCCAGGGTCTTACT               |
|                                                                        |                                   |
| Primers for constructs in dual luciferase reporter experiments (5'-3') |                                   |
| Qki6 3'UTR forward                                                     | TGCTCTAGACTTTGTAAAGTAATCCCACTC    |
| Qki6 3'UTR reverse                                                     | ACTGGCCGGCCAACGGTTGTCCCATAGTCTTAA |
| ACVR1B 3'UTR forward                                                   | CGGGATCCCGTCTAACTGCTCCCTCTCT      |
| ACVR1B 3'UTR reverse                                                   | GCTCTAGAGCGTGTCTGTCTCAAACCCA      |
|                                                                        |                                   |
| Primers for constructs in gene overexpression (5'-3')                  |                                   |
| KLRC2 forward                                                          | CGGGATCCGATGAATAAACAAAGAGGAACCT   |
| KLRC2 reverse                                                          | GCTCTAGATTTCTGGATAGCTTTATTGAAGT   |
| IBAS57-AS1 forward                                                     | CGGGATCCACGTGTGGCTGTTGTGTCAT      |
| IBAS57-AS1 reverse                                                     | GCTCTAGAGACCTCTGCTTGCTGGGACT      |
| S100A1 forward                                                         | CGGGATCCATGGGCTCTGAGCTGGAG        |
| S100A1 reverse                                                         | GCTCTAGATCAACTGTTCTCCCAGAA        |
| TMEM54 forward                                                         | CGGGATCCAAGTGGGCGAGCGCGACG        |
| TMEM54 reverse                                                         | GCTCTAGATCAGAGGGTCAGAGGCTCA       |
|                                                                        |                                   |



| Primers for reverse transcription (RT) of mRNAs and microRNAs (5'-3') |                                                         |
|-----------------------------------------------------------------------|---------------------------------------------------------|
| mRNA RT                                                               | TTTTTTTTTTTTTTTTTTTT                                    |
| 574-5p-RT                                                             | GTCGTATCCAGTGCAGGGTCCGAGGTATTGCGCACTGGATAC<br>GACACACAC |
| 574-3p-RT                                                             | GTCGTATCCAGTGCAGGGTCCGAGGTATTGCGCACTGGATAC<br>GACTGTGGG |
| u6-RT                                                                 | AAAATATGGAACGCTTCACGAATTTG                              |
|                                                                       |                                                         |
| Sequences for mimics in microRNA pull-down experiments (5'-3')        |                                                         |
| miR-574-5p                                                            | UGAGUGUGUGUGUGUGAGUGUGU                                 |
| miR-574-3p                                                            | CACGCUCAUGCACACACCCACA                                  |
| miR-574-5p-Mut                                                        | UGCUCUGACUUGUGUGAGUGUGU                                 |
| miR-574-3p-Mut                                                        | CAUAUCAGCUCACACACCCACA                                  |
| NC-mimic                                                              | UUUGUACUACACAAAAGUACUG                                  |
