# Supplementary material for: microRNA arm-imbalance in part from complementary targets mediated decay promotes gastric cancer progression
Source: PubMed Central journal article supplement (PMC6764945; doi:10.1038/s41467-019-12292-5), 2019-09-27
Supplement: 41467_2019_12292_MOESM3_ESM.pdf [file 41467_2019_12292_MOESM3_ESM.pdf]

## **Description of Additional Supplementary Files**

File Name: Supplementary Data 1

Description: Global gene expression analysis in MGC-803 cells with miR-574 overexpression.

File Name: Supplementary Data 2

Description: RNA-sequencing of biotinylated miRNA pull-down.

File Name: Supplementary Data 3

Description: miR-574-5p/-3p isoform analysis in MGC-803 with IBA57-AS1, KLRC2, S100A1 and TMEM54 overexpression.

File Name: Supplementary Data 4

Description: Global gene expression analysis in MGC-803 cells with IBA57-AS1, KLRC2 overexpression or S100A1, TMEM54 knock down.

File Name: Supplementary Data 5

Description: miRNA pairs showed converse expression change in gastric cancer compared with normal controls.
